# Supplementary material for: Triphenylphosphine modified graphene quantum dots: spectral modulation for full spectrum of visible light with high quantum yield
Source: Royal Society of Chemistry journal article supplement (doi:10.1039/c5ra04001a), 2015-01-01
Supplement: c5ra04001a1.pdf [file c5ra04001a1.pdf]

## Supplementary Information

### **Solvent effect on triphenylphosphine modified graphene quantum dots: spectral modulation for full spectrum of visible light with high quantum yield**

**Siwei Yang<sup>a †</sup>, Chong Zhu<sup>a b †</sup>, Jing Sun<sup>a</sup>, Peng He<sup>a</sup>, Ningyi Yuan<sup>b</sup>, Jianning Ding<sup>b</sup>, Guqiao Ding<sup>a \*</sup>, Xiaoming Xie<sup>a</sup>**

<sup>a</sup> State Key Laboratory of Functional Materials for Informatics, Shanghai Institute of Microsystem and Information Technology, Chinese Academy of Science, Shanghai 20050, P. R. China

<sup>b</sup> School of Materials Science and Engineering, Changzhou University, Changzhou 21300, P. R. China

†These authors are co-first authors

\*Corresponding author: Prof. Guqiao Ding, [gqding@mail.sim.ac.cn](mailto:gqding@mail.sim.ac.cn)

## Experimental Section

TEM measurements were carried out on a spherical aberration-corrected TEM (FEI Titan 80-300) at 80 kV. X-ray photoelectron spectra (XPS) were carried out on a PHI Quantera II system (Ulvac-PHI, INC, Japan). Fourier transform infrared (FTIR) was performed on a BRUKE Vertex 70 (resolution 0.4 cm<sup>-1</sup>) infrared spectrometer and samples were dispersed in potassium bromide and compressed into pellets.

The UV-vis spectra were obtained on a UV5800 Spectrophotometer. PL and PLE spectra were recorded on a PerkinElmer LS55 luminescence spectrometer (PerkinElmer Instruments, U.K.) at room temperature in aqueous solution. The stability of these products was determined via contrast the fluorescent emission intensity of products aqueous solution under different conservative time at room temperature. Time-resolved fluorescence behavior was measured via the time-correlated single-photon counting (TCSPC) technique (Hydra Harp 400, Pico Quant). The samples were excited by a frequency-doubled titanium: sapphire oscillator laser with approximately a pulse duration of 150 fs, and a repetition rate of 80 MHz (Chameleon, Coherent). Fluorescence emission was sent to a spectrometer (iHR550, Horiba Jobin Yvon) with 300/mm grating and then detected by a photomultiplier tube. The time-resolved PL curves were fitted with a bi-exponential decay.

As the most direct and important index, the quantum yield ( $\phi$ ) of N-GQDs was calculated according to equation 1:<sup>s1</sup>

$$\phi = \phi_R \times \frac{I}{I_R} \times \frac{A_R}{A} \times \frac{\eta^2}{\eta_R^2} \quad (1)$$

where I is the measured integrated emission intensity,  $\eta$  is the refractive index of the solvent, A is the optical density, and the subscript R refers to the reference standard with a known  $\phi$  (RhB in ethanol solution,  $\phi_R=0.68$ ). In order to minimize reabsorption effects, absorbance was kept under 0.1 at 460 nm excitation wavelength in 10×10 mm fluorescence cuvette.

Synthesis of graphene oxide quantum dots (GOQDs)

GOQDs were prepared from graphene powder (SIMBATT, Shanghai, China) by a modified Staudenmaier method. Graphene powder (4 g) was put into H<sub>2</sub>SO<sub>4</sub> (150 mL) and HNO<sub>3</sub> (80 mL) with stirring at 15 °C, and was kept for 2 h. Then NaClO<sub>3</sub> (40 g) was added gradually and the temperature was kept below 5 °C. The mixture was then stirred at 15 °C for 5 h. After that, the reaction was terminated by adding distilled water (80 mL). The pH value was neutralised to 7 by NaOH, before the mixture was filtered using an alumina inorganic membrane with 20 nm pores. The resulting light yellow filtrate was dialysed in a 3500 Da dialysis bag against deionised water for a week to remove excess salt. The resultant solution was freeze-dried to obtain the GOQD powder. The GOQD yield from graphene is approximately 45%.

Table S1 A brief summary of the characteristics of GQDs.

| Size     | $\phi$                 | $\tau$ / ns | Doping agent<br>(content) | Ref.<br>(Raw material)     |
|----------|------------------------|-------------|---------------------------|----------------------------|
| 1-6 nm   | 0.64 <sup>a</sup>      | 6.4         | P(Ph) <sub>3</sub>        | This work (graphite)       |
| 1-3 nm   | 0.74 <sup>a</sup>      | 11.5        | N (N/C=10.06%)            | 18 (graphite)              |
| 2-5 nm   | -                      | -           | N (N/C=4.3%)              | S2 (graphite)              |
| 3-9 nm   | 0.16 <sup>b</sup>      | -           | N (-)                     | S3 (graphite)              |
| 2-6 nm   | 0.24 <sup>c</sup>      | -           | N (N/C=17.88%)            | S4 (graphite)              |
| 2.6 nm   | 0.49 <sup>d</sup>      | -           | N and B                   | S5(graphite)               |
| 2.5 nm   | 0.29-0.19 <sup>e</sup> | -           | N (N/C=12%)               | S6(graphite)               |
| 1-7 nm   | 0.086 <sup>f</sup>     | -           | N (N/C=5.6%)              | S7(graphite)               |
| 10-35 nm | -                      | 1.29        | -                         | S8(graphite)               |
| 2-9 nm   | 0.11 <sup>g</sup>      | -           | -                         | S9(graphite)               |
| 3-5 nm   | 0.12 <sup>g</sup>      | 7.7         | -                         | S10(graphite)              |
| 4-24 nm  | 0.28 <sup>h</sup>      | -           | PEG                       | S11(graphite)              |
| 3-9 nm   | 0.088 <sup>i</sup>     | -           | isopropanol               | S12(graphite)              |
| 12-17 nm | 0.18 <sup>j</sup>      | -           | PEG                       | S13 (graphite)             |
| 1-4 nm   | -                      | 5.36        | -                         | S14 (graphite)             |
| 2-4 nm   | 0.71                   | 7.6         | N, S                      | S15 (citric acid and urea) |
| 2-6 nm   | 0.60                   | 6           | PEG                       | S16 (carbon soot)          |

<sup>a</sup>:Quantum yield was calculated using those of Rhodamine B ( $\phi=0.68$ ) in EtOH as a standard.

<sup>b</sup>:Quantum yield was calculated using those of Quinine sulfate ( $\phi=0.577$ ) in water as a standard.

<sup>c</sup>: Quantum yield was calculated using Quinine sulfate ( $\phi= 0.54$ ) in 0.1 M H<sub>2</sub>SO<sub>4</sub> as a standard.

<sup>d</sup>: Quantum yield was calculated using Rhodamine B ( $\phi=0.31$ ) in water as a standard.

e: Quantum yield was calculated using quinine sulphate ( $\phi=0.54$ ) in 0.5 M H<sub>2</sub>SO<sub>4</sub> as a standard.

f: Quantum yield was calculated using Quinine sulfate ( $\phi=0.54$ ) in water as a standard.

g: Quantum yield was calculated using 9,10-Bis(phenylethynyl) anthracene ( $\phi=1$ ) in cyclohexane as a standard.

h: Quantum yield was calculated using Rhodamine B ( $\phi=0.31$ ) in water as a standard.

i: Quantum yield was calculated using Fluorescein ( $\phi=0.95$ ) in water as a standard.

j: Quantum yield was calculated using 9,10-Bis(phenylethynyl) anthracene ( $\phi=1$ ) in cyclohexane as a standard.

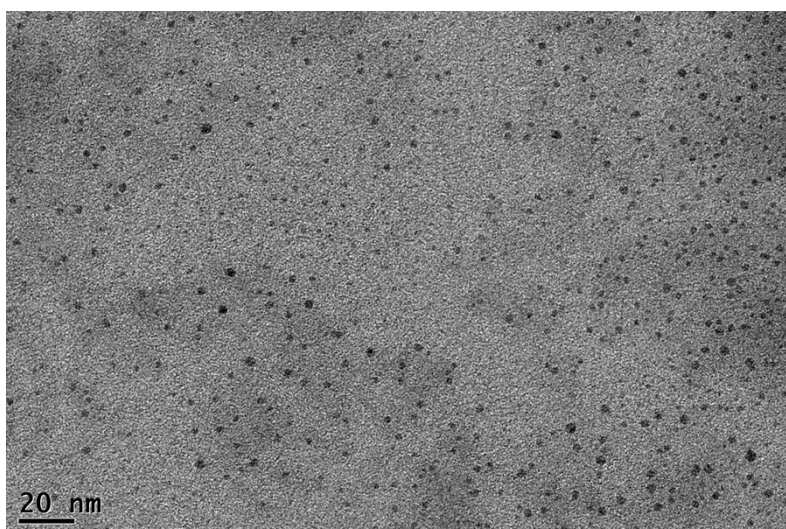

**Fig. S1** TEM image of GOQDs

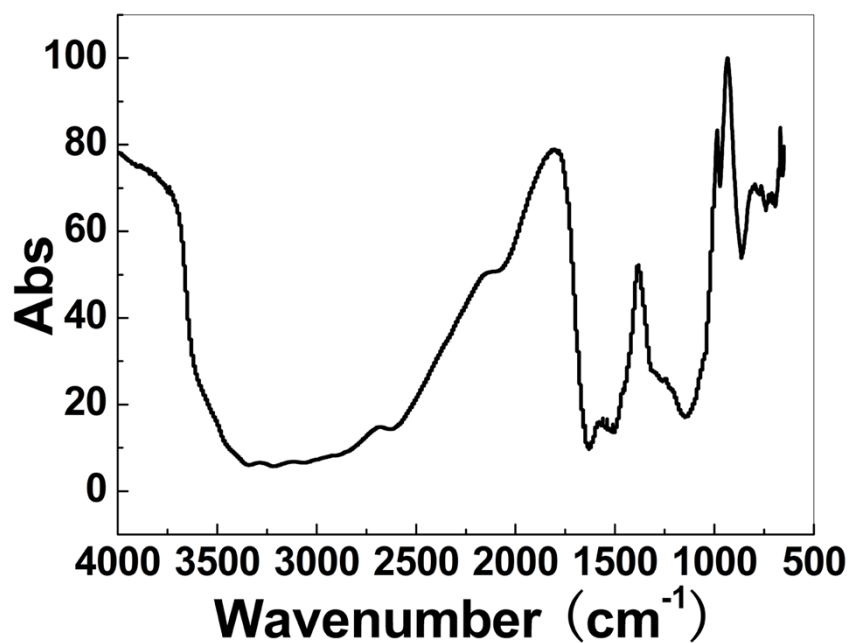

**Fig. S2** FTIR spectrum of P-GQDs.

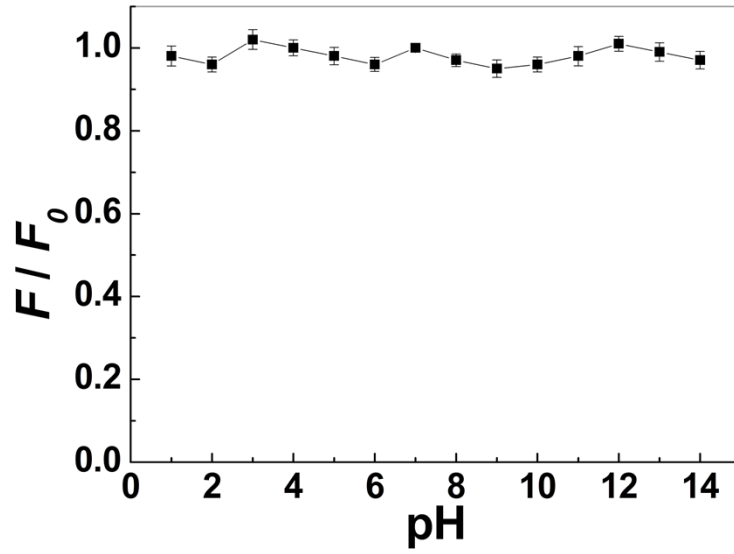

**Fig. S3** PL intensity of P-GQDs under different pH. The  $F$  and  $F_0$  are PL intensity of P-GQDs when pH=7 and other value, respectively. The concentration of P-GQDs is 0.1 mg/L.

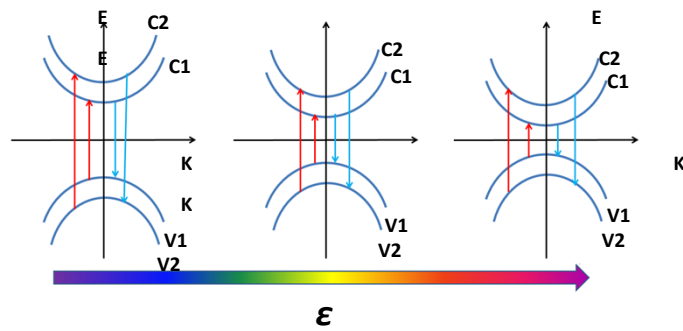

**Fig. S4** The schematic diagrams of tunable emission mechanism of P-GQDs.

## References

- [S1] J. D. Demas, G. A. Crosby, *J. Phys. Chem.* **1971**, *75*, 991.
- [S2] Y. Li, Y. Zhao, H. Cheng, Y. Hu, G. Shi, L. Dai, L. Qu, *J. Am. Chem. Soc.* **2012**, *134*, 15.
- [S3] H. Sun, N. Gao, L. Wu, J. Ren, W. Wei, X. Qu. *Chem. Eur. J.* **2013**, *19*, 13362.
- [S4] C. Hu, Y. Liu, Y. Yang, J. Cui, Z. Huang, Y. Wang, L. Yang, H. Wang, Y. Xiao, J. Rong, *J. Mater. Chem. B.* **2013**, *1*, 39.
- [S5] Z. Qu, X. Zhou, L. Gu, R. Lan, D. Sun, D. Yu, G. Shi, *Chem. Commun.* **2013**, *49*, 9830.
- [S6] H. Tetsuka, R. Asahi, A. Nagoya, K. Okamoto, I. Tajima, R. Ohta, A. Okamoto. O. Tunable, *Adv. Mater.* **2012**, *24*, 5333.
- [S7] M. Li, W. Wu, W. Ren, H-M. Cheng, N. Tang, W. Zhong, Y. Du, *Appl. Phys. Lett.* **2012**, *101*, 103107.
- [S8] Q. Xu, Q. Zhou, Z. Hua, Q. Xue, C. Zhang, X. Wang, D. Pan, M. Xiao, *ACS Nano.* **2013**, *7*, 10654.
- [S9] S. Zhu, J. Zhang, C. Qiao, S. Tang, Y. Li, W. Yuan, B. Li, L. Tian, F. Liu, R. Hu, H. Gao, H. Wei, H. Zhang, H. Sun, B. Yang, *Chem. Commun.* **2011**, *47*, 6858.
- [S10] L. Wang, S-J. Zhu, H-Y. Wang, Y-F. Wang, Y-W, Hao, J-H. Zhang, Q-D. Chen, Y-L. Zhang, W. Han, B. Yang, H-B. Sun, *Adv. Optical Mater.* **2013**, *1*, 264.
- [S11] J. Shen, Y. Zhu, X. Yang, J. Zong, J. Zhang, C. Li, *J. Chem.* **2012**, *36*, 97.

- [S12] H. Sun, L. Wu, N. Gao, J. Ren, X. Qu, *ACS Appl. Mater. Interfaces*. **2013**, *5*, 1174.
- [S13] Z. Wang, J. Xia, C. Zhou, B. Via, Y. Xia, F.i Zhang, Y. Li, L. Xia, J. Tang, *Colloids and Surfaces B: Biointerfaces*. **2013**, *112*, 192.
- [S14] J. Peng, W. Gao, B. K. Gupta, Z. Liu, R. R. Aburto, L. Ge, L. Song, L. B. Alemany, X. Zhan, G. Gao, S. A. Vithayathil, B. A. Kaiparettu, A. A. Marti, T. Hayashi, J-J. Zhu, P. M. Ajayan, *Nano Lett.* **2012**, *12*, 844.
- [15] D. Qu, M. Zheng, P. Du, Y. Zhou, L. Zhang, D. Li, H. Tan, Z. Zhao, Z. Xie, Z. Sun, *Nanoscale*, **2013**, *5*, 12272.
- [S16] X. Wang, L. Cao, S. Yang, F. Lu, M. J. Mezziani, L. Tian, K. W. Sun, M. A. Bloodgood, Y. Sun, *Angew. Chem. Int. Ed.* **2010**, *122*, 5438.
